# Supplementary material for: An analysis of the African cancer research ecosystem: tackling disparities
Source: HighWire-hosted journal article supplement (doi:10.1136/bmjgh-2022-011338), 2023-02-01
Supplement: bmjgh-2022-011338supp001_data_supplement.pdf [file bmjgh-2022-011338supp001_data_supplement.pdf]

## Author Reflexivity Statement

### 1. How does this study address local research and policy priorities?

We were prompted to write this piece after repeatedly seeing several major journals in our field publish studies of cancer care in Sub-Saharan Africa with no (or token engagement of authors) from SSA. Further, this was further reinforced by a recent bibliometric analysis of cancer research across Africa that was published in BMJ-GH by Dr. Mutebi et al. which showed severe disparities in the cancer ecosystem even within Africa. Recommendations suggested in this study can be used as a roadmap for African researchers and policymakers to train, fund and shape the national cancer research agenda.

### 2. How were local researchers involved in study design?

Eight of the ten authors are African researchers

### 3. How has funding been used to support the local research team?

No funding for this article

### 4. How are research staff who conducted data collection acknowledged?

Everyone who contributed to this article is included as a co-author.

### 5. Do all members of the research partnership have access to study data?

N/A

### 6. How was data used to develop analytical skills within the partnership?

N/A

### 7. How have research partners collaborated in interpreting study data?

N/A

### 8. How were research partners supported to develop writing skills?

The first author and several other co-authors of this paper are early career oncologists and researchers who was guided by senior researchers.

**9. How will research products be shared to address local needs?**

This article is written by researchers from different African countries, it will be disseminated through the local medical community as well as policymakers.

**10. How are the leadership, contribution and ownership of this work by LMIC researchers recognized within the authorship?**

The first author and most co-authors are from LMIC

**11. How have early career researchers across the partnership been included within the authorship team?**

The first author and several other co-authors are early-career researchers

**12. How has gender balance been addressed within the authorship?**

Four of the ten co-authors identify themselves as females.

**13. How has the project contributed to the training of LMIC researchers?**

Apart from the first author, co-authors from LMICs were heavily involved in writing this article

**14. How has the project contributed to improvements in local infrastructure?**

NA

**15. What safeguarding procedures were used to protect local study participants and researchers?**

NA
